# Supplementary material
Source: PubMed Central journal article supplement (PMC2662287)
Supplement: C800194200_1.pdf [file C800194200_1.pdf]

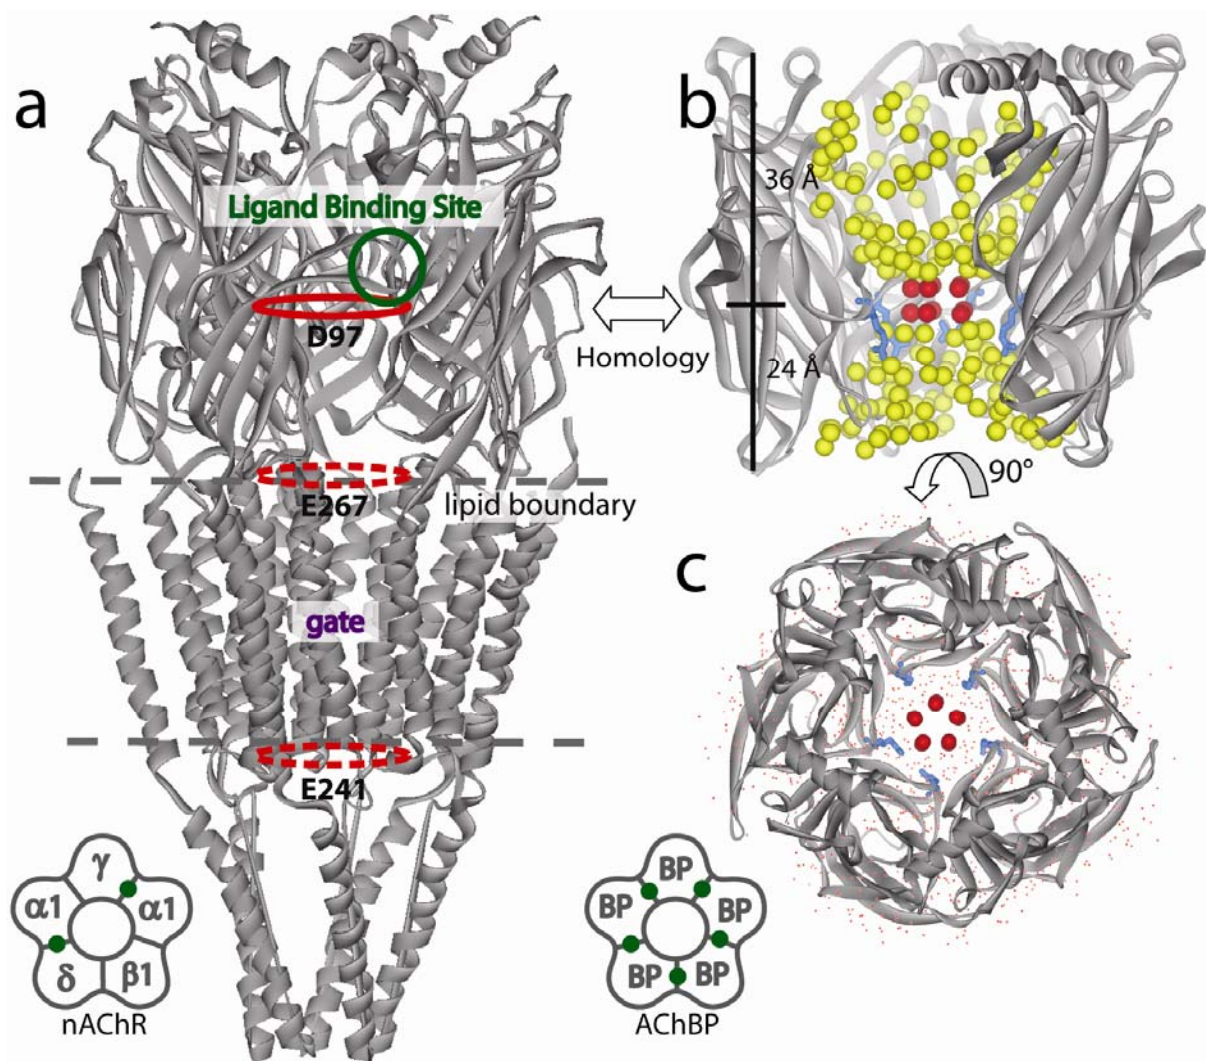

**Figure S1** **a**, nAChR is a hetero-pentameric receptor with two ligand binding sites (green) in its extracellular domain (ECD). Regions of ion selectivity are shown in red. A putative gate (purple) is located in the transmembrane domain. **b**, Homomeric AChBP is homologous to the ECD of the nAChR with five ligand binding sites. A, water filled *Ac*\_AChBP vestibule<sup>15</sup> is shown with one subunit removed. Vestibule waters are colored in yellow. Ten oxygen atoms at the constriction point are colored red and make a plane of two pentameric rings (108° angles) orthogonal to the five fold axis. **c**, Top view looking down the vestibule of AChBP.

**Table S1 Data Collection & Refinement Statistics**

| <i>Data collection</i>                         | SO <sub>4</sub> <sup>2-</sup> /cacodylate |
|------------------------------------------------|-------------------------------------------|
| Beamline                                       | ALS/ 8.2.2                                |
| Wavelength (Å)                                 | 1.00                                      |
| Space group                                    | P4 <sub>1</sub>                           |
| a, b, c (Å)                                    | 98.4, 98.4, 265.7                         |
| Pentamer / asymmetric unit                     | 2                                         |
| Resolution range <sup>1</sup>                  | 50 – 3.08 (3.19 – 3.08)                   |
| R <sub>merge</sub> (%) <sup>1,2</sup>          | 13.1 (48.8)                               |
| Observations                                   | 294,191                                   |
| Unique reflections                             | 46,364                                    |
| Completeness (%) <sup>1</sup>                  | 100 (100)                                 |
| Redundancy <sup>1</sup>                        | 6.3 (6.3)                                 |
| <I/σ> <sup>1</sup>                             | 14.3 (4.0)                                |
| B-factor from Wilson plot (Å <sup>2</sup> )    | 64.0                                      |
| <i>Refinement</i>                              |                                           |
| Resolution range (Å)                           | 20 – 3.1                                  |
| Protein atoms                                  | 17346                                     |
| Solvent / PEG atoms                            | 293 / 105                                 |
| R <sub>cryst</sub> (%) / R <sub>free</sub> (%) | 21.2 / 25.0                               |
| Free reflections                               | 2,300                                     |
| R.m.s. 1-2 bond distances (Å)                  | 0.012                                     |
| R.m.s. 1-3 bond angles (°)                     | 1.441                                     |
| Mean main / side chain B (Å <sup>2</sup> )     | 50.1 / 50.8                               |
| Mean B solvent / PEG (Å <sup>2</sup> )         | 17.5 / 69.9                               |
| PDB accession code                             | Xxxx                                      |

<sup>1</sup> Values in parentheses are for the highest resolution shell.

$$^2 R_{\text{merge}} = \frac{\sum_{hkl} \sum_i |I_{hkl} - \langle I_{hkl} \rangle|}{\sum_{hkl} \sum_i \langle I_{hkl} \rangle}; R_{\text{cryst}} = \frac{\sum ||F_o| - |F_c||}{\sum |F_o|}$$
